# Supplementary material
Source: publisher figshare collection journal article supplement (https://sage.figshare.com/ndownloader/files/23255339)
Supplement: Supplementary file 1 [file 23255339]

| **Saúde Geral: Durante as últimas 4 semanas** | | | | |
| --- | --- | --- | --- | --- |
| 1. Em geral, como você diria que a saúde de seu/sua filho(a) tem sido? | | | | |
| Ruim | Regular | Boa | Muito Boa | Excelente |
| 1. Com que frequência seu/sua filho(a) fica doente? | | | | |
| Sempre | Quase sempre | Algumas vezes | Raramente | Nunca |  |  |  |  |

| **Dor/Desconforto: Durante as últimas 4 semanas** | | | | |
| --- | --- | --- | --- | --- |
| 1. Com que frequência seu/sua filho(a) sentiu alguma dor ou desconforto? | | | | |
| Sempre | Quase sempre | Algumas vezes | Raramente | Nunca |
| 1. O quão forte tem sido a dor e/ou desconforto de seu/sua filho(a)? | | | | |
| Muito forte | Forte | Moderada | Fraca | Nenhuma Dor |  |  |  |  |

| **Função Pulmonar: Durante as últimas 4 semanas** | | | | |
| --- | --- | --- | --- | --- |
| 1. O quão difícil foi para seu/sua filho(a) chorar, balbuciar, falar (de acordo com a idade) sem sentir falta de ar? | | | | |
| Difícil | Um pouco difícil | Neutro | Um pouco fácil | Fácil |
| 1. Com que frequência seu/sua filho(a) sente falta de ar fazendo algum tipo de atividade? | | | | |
| Sempre | Quase sempre | Algumas vezes | Raramente | Nunca |

| **Acessibilidade: Durante as últimas 4 semanas** | | | | |
| --- | --- | --- | --- | --- |
| 1. Com que frequência a condição de saúde de seu/sua filho(a) limitou o acesso dele(a) aos lugares? | | | | |
| Sempre | Quase sempre | Algumas vezes | Raramente | Nunca |

| **Função Física: Durante as últimas 4 semanas** | | | | |
| --- | --- | --- | --- | --- |
| 1. O quão difícil foi para seu/sua filho(a) mover a parte superior do corpo dele(a)? | | | | |
| Difícil | Um pouco difícil | Neutro | Um pouco fácil | Fácil |
| 1. O quão difícil foi para seu/sua filho(a) se sentar sozinho(a)? | | | | |
| Difícil | Um pouco difícil | Neutro | Um pouco fácil | Fácil |
| 1. . O quão difícil foi para seu/sua filho(a) manter o equilíbrio enquanto engatinha, anda ou corre? | | | | |
| Difícil | Um pouco difícil | Neutro | Um pouco fácil | Fácil |

| **Vivência Cotidiana: Durante as últimas 4 semanas** | | | | |
| --- | --- | --- | --- | --- |
| 1. . O quão difícil foi para seu/sua filho(a) se vestir sozinho(a) ou com ajuda de alguém?   (exemplos: ajudar a tirar ou pôr roupas, empurrar braços e pernas através de camisas ou calças, ou ajudar com prendedores, zíperes, botões, velcro etc) | | | | |
| Difícil | Um pouco difícil | Neutro | Um pouco fácil | Fácil |
| 1. . Meu/minha filho(a) necessita de mais tempo do que o esperado de uma criança para comer a mesma quantidade de comida. | | | | |
| Concordo bastante | Concordo um pouco | Não concordo nem discordo | Discordo um pouco | Discordo bastante |

| **Fatiga/ Nível de Energia: Durante as últimas 4 semanas** | | | | |
| --- | --- | --- | --- | --- |
| 1. . O quão frequentemente seu/sua filho(a) se sente cansado(a)? | | | | |
| Sempre | Quase sempre | Algumas vezes | Quase nunca | Nunca |
| 1. . O quão difícil foi para seu/sua filho(a) manter a energia dele(a) durante o dia inteiro? | | | | |
| Difícil | Um pouco difícil | Neutro | Um pouco fácil | Fácil |

| **Emoções: Durante as últimas 4 semanas** | | | | |
| --- | --- | --- | --- | --- |
| 15. Com que frequência seu/sua filho(a) se sente ansioso(a) por causa da condição médica dele(a)? | | | | |
| Sempre | Quase sempre | Algumas vezes | Quase nunca | Nunca |
| 16. Com que frequência seu/sua filho(a) se sentiu frustrado devido a condição médica dele(a)? | | | | |
| Sempre | Quase sempre | Algumas vezes | Quase nunca | Nunca |

| **Impacto nos Pais: Durante as últimas 4 semanas** | | | | | | | | |
| --- | --- | --- | --- | --- | --- | --- | --- | --- |
| 17. Com que frequência você se sentiu ansioso(a)/nervoso(a) por causa da condição médica de seu/sua filho(a)? | | | | | | | | |
| Sempre | Quase sempre | | Algumas vezes | | Quase nunca | | Nunca | |
| 18. Com que frequência a condição médica de seu/sua filho(a) interferiu nas atividades da família? | | | | | | | | |
| Sempre | Quase sempre | | Algumas vezes | | Quase nunca | | Nunca | |
| 19. Qual foi o impacto da condição médica de seu/sua filho(a) que você sentiu em seu nível de energia? | | | | | | | | |
| Extremo | Alto | | Neutro | | Baixo | | Nenhum | |
| 20. Com que frequência você perdeu ou se atrasou para o trabalho ou para eventos sociais devido à condição médica de seu/sua filho(a)? | | | | | | | | |
| Sempre | Quase sempre | | Algumas vezes | | Quase nunca | | Nunca | |
| 21. Você tem tempo de passar tempo com seu/sua parceiro(a), família, esposo(a), apesar da condição médica de seu/sua filho(a)? | | | | | | | | |
| Nem um pouco | Um pouco | | Mais ou menos | | Bastante | | Muito tempo | |
| **Impacto Financeiro: Durante as últimas 4 semanas** | | | | | | | | |
| 1. Qual foi o impacto em custos que o diagnóstico de Escoliose de Início Precoce teve em suas finanças? | | | | | | | | |
| Extremamente alto | | Alto | | Neutro | | Baixo | | Muito baixo |

| **Satisfação: Durante as últimas 4 semanas** | | | | |
| --- | --- | --- | --- | --- |
| 23. O quão satisfeito(a) está seu/sua filho(a) com a capacidade dele(a) para fazer coisas? | | | | |
| Muito insatisfeito | Insatisfeito | Neutro | Satisfeito | Muito satisfeito |
| 24. O quão satisfeito(a) você está com a capacidade de seu/sua filho(a) para fazer coisas? | | | | |
| Muito insatisfeito | Insatisfeito | Neutro | Satisfeito | Muito satisfeito |
